# Supplementary material for: Flexible and transparent electrodes imprinted from Au nanowires: stability and ageing
Source: Royal Society of Chemistry journal article supplement (doi:10.1039/d2na00352j), 2022-01-01
Supplement: d2na00352j1.pdf [file d2na00352j1.pdf]

**SUPPORTING INFORMATION TO:**  
**Flexible and transparent electrodes**  
**imprinted from Au nanowires:**  
**stability and ageing**

Lukas F. Engel,<sup>†</sup> Lola González-García,<sup>\*,‡</sup> and Tobias Kraus<sup>\*,‡,†</sup>

<sup>†</sup>*Colloid and Interface Chemistry, Saarland University, Campus D2 2, 66123 Saarbrücken,  
Germany*

<sup>‡</sup>*INM — Leibniz Institute for New Materials, Campus D2 2, 66123 Saarbrücken, Germany*

E-mail: lola.garcia@leibniz-inm.de; tobias.kraus@leibniz-inm.de

# 1 Ageing of AuNW electrodes

We monitored the sheet resistance of AuNW electrodes imprinted using ink concentrations between 1 mg/mL and 10 mg/mL on PET foil to study their ageing behaviour. Note that imprinting at 1 mg/mL led to structures that were close to the percolation threshold so that their initial sheet resistance was too high for FTEs.

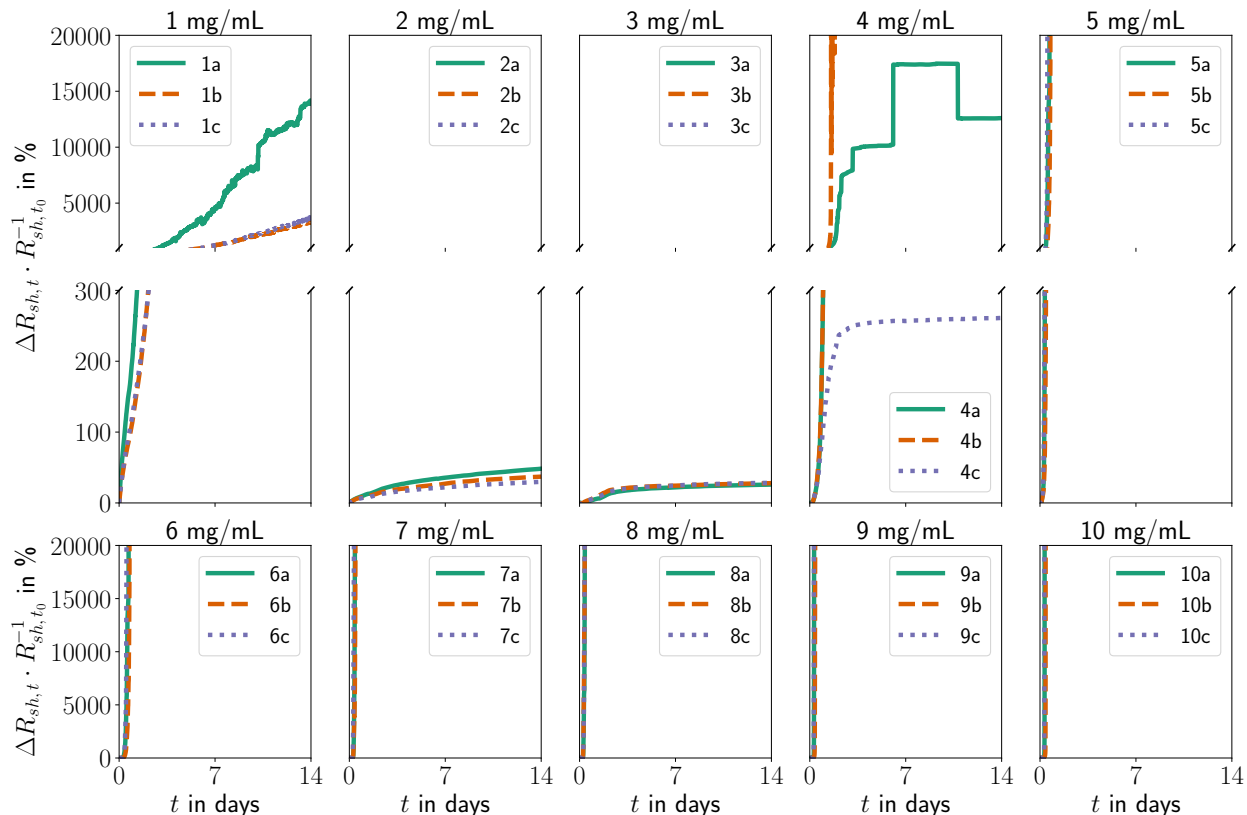

Figure S1: Relative change in sheet resistance  $(R_{sh,t} - R_{sh,t_0}) \cdot R_{sh,t_0}^{-1} = \Delta R_{sh,t} \cdot R_{sh,t_0}^{-1}$  after time  $t$  for three electrodes each, imprinted at the respective same concentration  $c_{Au}$ .

## 2 AuNW properties

### 2.1 Wire arrangement and inter-wire distance within printed lines

SAXS measurements were carried out to determine the wires' arrangement within lines imprinted at  $c_{Au} = 2 \text{ mg/mL}$  and  $6 \text{ mg/mL}$ . The peak positions  $q_{(1,0)}$  and  $q_{(1,1)} \approx \sqrt{3} \cdot q_{(1,0)}$  indicate the same 2D hexagonal wire arrangement with a core center-to-center distance of  $a_{c-c} = 4.22 \pm 0.04 \text{ nm}$  for both concentrations, according to Förster et al.:<sup>1</sup>

$$a_{c-c} = \frac{4\pi}{\sqrt{3}} \cdot q_{(1,0)}^{-1} = 4\pi \cdot q_{(1,1)}^{-1} = 4.22 \pm 0.04 \text{ nm} \quad (\text{S1})$$

$a_{c-c}$  in TEM appears smaller because a) the wires do not always run straight, but overlap and intertwine, and b) a TEM lamella has a finite thickness and multiple wires overlap.

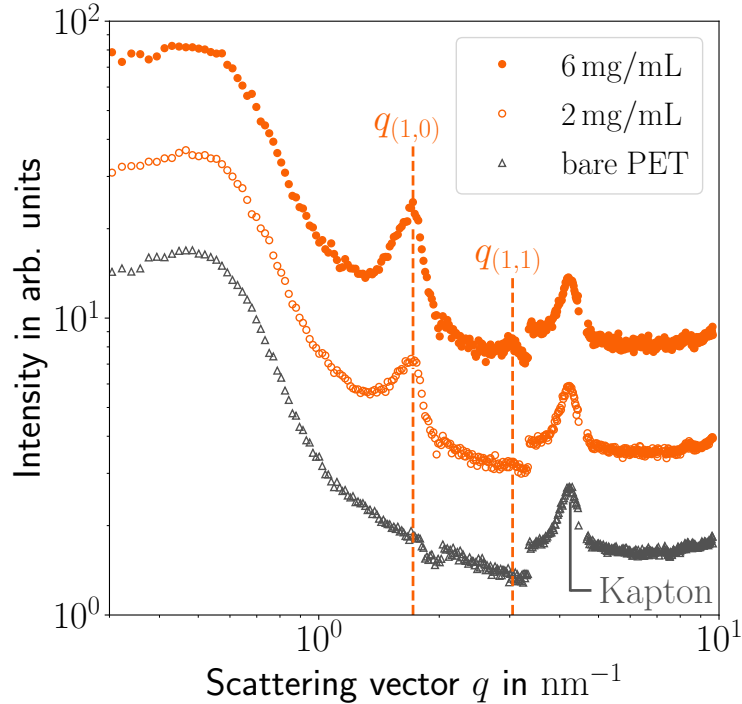

Figure S2: Integrated SAXS scattering of grids imprinted at  $2 \text{ mg/mL}$  (relatively stable electrode) and  $6 \text{ mg/mL}$  (highly unstable electrode) on PET as well as of bare PET as reference (the Kapton<sup>®</sup> peak stems from the Kapton<sup>®</sup> window used to separate the sample from the evacuated scattering path | scattering curves have been shifted for better visibility).

## 2.2 Organic content: volumetric fraction

The volumetric fraction of OAm in printed lines was estimated from the organic content of AuNW that had been purified twice and analyzed via thermogravimetric analysis (TGA) in a previous publication:

$$f_{V,OAm} = \frac{f_{w,OAm} \cdot (\rho_{OAm})^{-1}}{f_{w,OAm} \cdot (\rho_{OAm})^{-1} + f_{w,Au} \cdot (\rho_{Au})^{-1}} \cdot 100 \% \approx 87.05 \text{ vol\%} \quad (\text{S2})$$

with  $f_{V,OAm}$  the volume fraction of OAm,  $f_{w,OAm} \approx 22 \text{ wt\%}$  the mass fraction of OAm (determined via TGA by Bettscheider et al.<sup>2</sup>),  $f_{w,Au} \approx 78 \text{ wt\%}$  the mass fraction of Au,  $\rho_{OAm} = 0.81 \text{ g/cm}^3$  the density of OAm<sup>3</sup> and  $\rho_{Au} = 19.3 \text{ g/cm}^3$  the density of Au,<sup>4</sup> both at room temperature.

## 3 Sintered line morphology in cross section at 2 mg/mL

Transmission electron microscopy (TEM) was used to test the effect of plasma sintering on the inner morphology of the printed lines. For grids imprinted at 2 mg/mL, plasma sintering visibly coarsened the inner morphology down to the substrate.

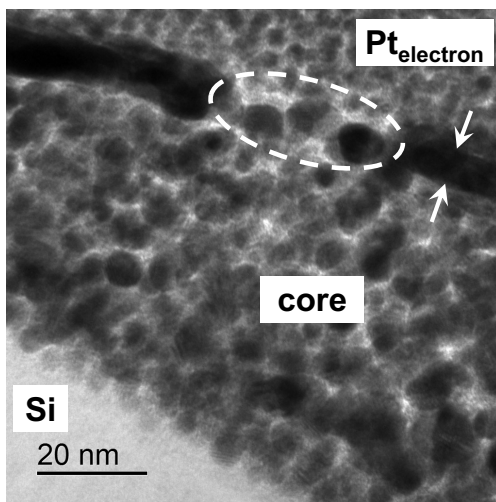

Figure S3: TEM close-up of the inner line morphology directly after plasma sintering for grids imprinted at 2 mg/mL on a Si wafer. White arrows indicate the sintered shell. The white dashed oval marks a porous part of the shell.

## References

- (1) Förster, S.; Timmann, A.; Konrad, M.; Schellbach, C.; Meyer, A.; Funari, S. S.; Mulvaney, P.; Knott, R. Scattering curves of ordered mesoscopic materials. *The journal of physical chemistry. B* **2005**, *109*, 1347–1360.
- (2) Bettscheider, S.; Kuttich, B.; Engel, L. F.; González-García, L.; Kraus, T. Bundling of Nanowires Induced by Unbound Ligand. *The Journal of Physical Chemistry C* **2021**, *125*, 3590–3598.
- (3) Oleylamine, approximate C18-content 80-90%: SDS. 2009; <https://www.fishersci.de/store/msds?partNumber=10400380&productDescription=100ML+Oleylamine%2C+approximate+C18-content+80-90%25&countryCode=DE&language=de>.
- (4) Haynes, W. M., Ed. *CRC Handbook of chemistry and physics: A ready-reference book of chemical and physical data*, 97th ed.; CRC Press: Boca Raton and London and New York, 2017.
